# Supplementary material for: Combined serum levels of multiple proteins in tPA-BDNF pathway may aid the diagnosis of five mental disorders
Source: PubMed Central journal article supplement (PMC5537244; doi:10.1038/s41598-017-06832-6), 2017-07-31
Supplement: 41598_2017_6832_MOESM1_ESM.pdf [file 41598_2017_6832_MOESM1_ESM.pdf]

## **Combined serum levels of multiple proteins in tPA-BDNF pathway may aid the diagnosis of five mental disorders**

Suzhen Chen, MD<sup>1,2</sup>, Haitang Jiang, MD<sup>1,2</sup>, Yang Liu, BD<sup>3</sup>, Zhenhua Hou, MD<sup>1,2</sup>, Yingying Yue, MD<sup>1,2</sup>, Yuqun Zhang, MD<sup>1,2</sup>, Fuying Zhao, MD<sup>1,2</sup>, Zhi Xu, PhD<sup>1,2</sup>, Yinghui Li, MD<sup>1,2</sup>, Xiaodong Mou, PhD<sup>1,2</sup>, Lei Li, MD<sup>1,2</sup>, Tianyu Wang, MD<sup>1,2</sup>, Jingjing Zhao, BD<sup>4</sup>, Chongyang Han, MD<sup>4</sup>, Yuxiu Sui, PhD<sup>4</sup>, Ming Wang, BD<sup>5</sup>, Zhong Yang, BD<sup>5</sup>, Yan Lu, BD<sup>6</sup>, Yifeng Zhu, BD<sup>6</sup>, Jianhua Li, MD<sup>7</sup>, Xinhua Shen, MD<sup>7</sup>, Fei Sun, BD<sup>8</sup>, Qingsong Chen, BD<sup>8</sup>, Huanxin Chen, PhD<sup>9</sup> & Yonggui Yuan, PhD<sup>1,2\*</sup>

<sup>1</sup>Department of Psychosomatics and Psychiatry, ZhongDa Hospital, Medical School of Southeast University, Nanjing 210009, PR China.

<sup>2</sup>Institute of Psychosomatics, Medical School of Southeast University, Nanjing 210009, PR China.

<sup>3</sup>Institute of Neuropsychiatric, Brain Hospital, Nanjing Medical University, Nanjing 210029, PR China.

<sup>4</sup>Department of Psychiatry, Brain Hospital, Nanjing Medical University, Nanjing 210029, PR China.

<sup>5</sup>Department of Psychiatry, The Third People's Hospital of Changshu, Suzhou 215500, PR China.

<sup>6</sup>Department of Psychiatry, The Fourth People's Hospital of Zhangjiagang, Suzhou 215600, PR China.

<sup>7</sup>Department of Psychiatry, The Third People's Hospital of Huzhou, Huzhou 313000, PR China.

<sup>8</sup>Department of Psychiatry, The Second People's Hospital of Jingjiang, Taizhou 214500, PR China.

<sup>9</sup>Key Laboratory of Cognition and Personality, Ministry of Education; School of Psychology, Southwest University, Chongqing 400175, PR China.

\*Corresponding author at: Department of Psychosomatics and Psychiatry, ZhongDa Hospital, Medical School of Southeast University, Nanjing 210009, PR China.

Tel./fax:+86 25 83285124; E-mail address: yygylh2000@sina.com(Y. Yuan).

**Supplementary Table 1.** Correlation analysis among tPA, PAI-1, BDNF, proBDNF, TrkB, p75NTR, BDNF/proBDNF ratio and clinical variables in different disorders.

| Disorders | Clinical variables                  | tPA                                     | PAI-1                                  | BDNF                                    | proBDNF             | TrkB                | p75NTR              | BDNF/proBDNF ratio                      |
|-----------|-------------------------------------|-----------------------------------------|----------------------------------------|-----------------------------------------|---------------------|---------------------|---------------------|-----------------------------------------|
| SZ        | SAPS total score                    | $r=0.215, P=0.231$                      | $r=-0.108, P=0.542$                    | <b><math>r=-0.344, P=0.047^*</math></b> | $r=0.035, P=0.851$  | $r=-0.236, P=0.186$ | $r=-0.020, P=0.920$ | $r=-0.232, P=0.202$                     |
|           | SAPS comprehensive evaluation score | <b><math>r=0.352, P=0.044^*</math></b>  | $r=-0.124, P=0.484$                    | $r=-0.248, P=0.157$                     | $r=-0.022, P=0.903$ | $r=-0.305, P=0.084$ | $r=0.220, P=0.584$  | $r=-0.183, P=0.316$                     |
|           | Age                                 | $r=0.233, P=0.191$                      | $r=-0.155, P=0.381$                    | $r=0.079, P=0.659$                      | $r=0.003, P=0.989$  | $r=0.224, P=0.210$  | $r=0.208, P=0.298$  | $r=-0.095, P=0.605$                     |
|           | BMI                                 | $r=0.124, P=0.492$                      | <b><math>r=0.358, P=0.038^*</math></b> | $r=-0.187, P=0.290$                     | $r=-0.161, P=0.378$ | $r=-0.224, P=0.209$ | $r=-0.277, P=0.161$ | $r=-0.104, P=0.571$                     |
|           | Education                           | $r=-0.007, P=0.970$                     | $r=0.098, P=0.581$                     | $r=0.188, P=0.286$                      | $r=-0.149, P=0.416$ | $r=0.119, P=0.509$  | $r=0.283, P=0.153$  | $r=0.187, P=0.306$                      |
|           | Duration of illness                 | $r=-0.075, P=0.676$                     | $r=0.022, P=0.902$                     | $r=-0.129, P=0.468$                     | $r=-0.121, P=0.510$ | $r=0.147, P=0.414$  | $r=-0.141, P=0.483$ | $r=0.039, P=0.832$                      |
| MDD       | HDRS score                          | $r=-0.125, P=0.511$                     | $r=0.038, P=0.840$                     | $r=-0.165, P=0.383$                     | $r=0.352, P=0.067$  | $r=0.181, P=0.349$  | $r=0.233, P=0.252$  | <b><math>r=-0.403, P=0.033^*</math></b> |
|           | Age                                 | $r=0.130, P=0.494$                      | $r=-0.195, P=0.301$                    | $r=-0.030, P=0.876$                     | $r=0.115, P=0.559$  | $r=-0.231, P=0.229$ | $r=-0.171, P=0.403$ | $r=-0.020, P=0.920$                     |
|           | BMI                                 | <b><math>r=-0.565, P=0.001^*</math></b> | $r=-0.066, P=0.728$                    | $r=0.159, P=0.403$                      | $r=0.096, P=0.629$  | $r=0.004, P=0.984$  | $r=-0.377, P=0.057$ | $r=-0.130, P=0.511$                     |
|           | Education                           | $r=-0.190, P=0.315$                     | $r=0.206, P=0.274$                     | $r=-0.240, P=0.202$                     | $r=0.245, P=0.209$  | $r=0.266, P=0.162$  | $r=0.232, P=0.255$  | $r=-0.205, P=0.296$                     |
|           | Duration of illness                 | $r=0.153, P=0.420$                      | $r=-0.087, P=0.648$                    | $r=-0.115, P=0.546$                     | $r=-0.225, P=0.249$ | $r=-0.233, P=0.224$ | $r=-0.263, P=0.194$ | $r=0.268, P=0.168$                      |
|           | Episodes                            | $r=0.106, P=0.577$                      | $r=-0.077, P=0.685$                    | $r=0.106, P=0.577$                      | $r=0.105, P=0.581$  | $r=0.017, P=0.933$  | $r=0.026, P=0.893$  | $r=-0.121, P=0.555$                     |
| BM        | YMRS score                          | $r=-0.156, P=0.418$                     | $r=-0.239, P=0.204$                    | $r=0.222, P=0.239$                      | $r=0.199, P=0.301$  | $r=0.187, P=0.330$  | $r=0.071, P=0.748$  | $r=-0.031, P=0.872$                     |

|    |                     |                                         |                     |                     |                     |                                         |                                         |                                         |
|----|---------------------|-----------------------------------------|---------------------|---------------------|---------------------|-----------------------------------------|-----------------------------------------|-----------------------------------------|
|    | Age                 | $r=-0.095, P=0.624$                     | $r=-0.284, P=0.128$ | $r=-0.281, P=0.132$ | $r=-0.067, P=0.729$ | $r=-0.313, P=0.098$                     | $r=-0.273, P=0.207$                     | <b><math>r=-0.388, P=0.037^*</math></b> |
|    | BMI                 | $r=-0.103, P=0.595$                     | $r=0.084, P=0.660$  | $r=0.127, P=0.502$  | $r=0.144, P=0.456$  | $r=-0.201, P=0.297$                     | $r=-0.152, P=0.490$                     | $r=-0.096, P=0.619$                     |
|    | Education           | $r=-0.036, P=0.853$                     | $r=-0.046, P=0.809$ | $r=0.070, P=0.714$  | $r=0.147, P=0.446$  | $r=0.194, P=0.314$                      | $r=0.043, P=0.844$                      | $r=0.114, P=0.557$                      |
|    | Duration of illness | $r=0.264, P=0.166$                      | $r=0.039, P=0.836$  | $r=-0.093, P=0.625$ | $r=-0.125, P=0.517$ | $r=0.254, P=0.184$                      | <b><math>r=0.503, P=0.014^*</math></b>  | $r=0.006, P=0.973$                      |
|    | Episodes            | <b><math>r=-0.423, P=0.022^*</math></b> | $r=-0.099, P=0.601$ | $r=0.004, P=0.983$  | $r=-0.308, P=0.105$ | $r=-0.010, P=0.957$                     | $r=-0.407, P=0.054$                     | $r=0.156, P=0.419$                      |
| BD | HDRS score          | $r=-0.098, P=0.532$                     | $r=0.219, P=0.164$  | $r=0.156, P=0.320$  | $r=0.158, P=0.329$  | $r=-0.010, P=0.951$                     | $r=0.177, P=0.305$                      | $r=-0.069, P=0.670$                     |
|    | Age                 | $r=0.044, P=0.778$                      | $r=0.013, P=0.932$  | $r=-0.231, P=0.134$ | $r=-0.063, P=0.694$ | <b><math>r=-0.443, P=0.006^*</math></b> | $r=-0.089, P=0.599$                     | $r=-0.168, P=0.290$                     |
|    | BMI                 | $r=0.156, P=0.310$                      | $r=0.247, P=0.108$  | $r=0.177, P=0.248$  | $r=0.115, P=0.468$  | <b><math>r=0.387, P=0.015^*</math></b>  | <b><math>r=0.429, P=0.011^*</math></b>  | $r=-0.048, P=0.763$                     |
|    | Education           | $r=-0.028, P=0.863$                     | $r=0.042, P=0.796$  | $r=0.023, P=0.886$  | $r=0.194, P=0.241$  | <b><math>r=0.330, P=0.048^*</math></b>  | $r=0.138, P=0.432$                      | $r=-0.122, P=0.460$                     |
|    | Duration of illness | <b><math>r=0.356, P=0.023^*</math></b>  | $r=0.076, P=0.630$  | $r=0.031, P=0.843$  | $r=0.054, P=0.738$  | $r=-0.303, P=0.063$                     | $r=-0.085, P=0.622$                     | $r=-0.064, P=0.693$                     |
|    | Episodes            | $r=0.206, P=0.358$                      | $r=-.143, P=.526$   | $r=.003, P=.989$    | $r=.266, P=.244$    | $r=-.288, P=.205$                       | $r=-.112, P=.649$                       | $r=-.074, P=.751$                       |
| PD | PDSS score          | $r=0.279, P=0.136$                      | $r=-0.118, P=0.535$ | $r=-0.039, P=0.837$ | $r=-0.263, P=0.176$ | <b><math>r=0.393, P=0.035^*</math></b>  | $r=0.260, P=0.210$                      | $r=-0.001, P=0.998$                     |
|    | HARS score          | $r=-0.080, P=0.675$                     | $r=0.156, P=0.409$  | $r=0.026, P=0.892$  | $r=0.091, P=0.645$  | $r=-0.045, P=0.817$                     | $r=0.141, P=0.502$                      | $r=-0.020, P=0.920$                     |
|    | Age                 | $r=0.062, P=0.746$                      | $r=-0.160, P=0.397$ | $r=-0.039, P=0.836$ | $r=-0.281, P=0.147$ | $r=-0.296, P=0.119$                     | $r=-0.304, P=0.139$                     | <b><math>r=0.406, P=0.032^*</math></b>  |
|    | BMI                 | $r=0.076, P=0.690$                      | $r=0.313, P=0.092$  | $r=-0.041, P=0.831$ | $r=0.117, P=0.554$  | $r=-0.345, P=0.067$                     | <b><math>r=-0.546, P=0.005^*</math></b> | $r=0.073, P=0.712$                      |
|    | Education           | $r=-0.267, P=0.154$                     | $r=0.328, P=0.076$  | $r=-0.182, P=0.335$ | $r=0.277, P=0.153$  | $r=-0.047, P=0.807$                     | $r=0.094, P=0.656$                      | <b><math>r=-0.391, P=0.040^*</math></b> |
|    | Duration of illness | $r=0.021, P=0.912$                      | $r=0.042, P=0.826$  | $r=-0.319, P=0.086$ | $r=-0.119, P=0.548$ | $r=-0.102, P=0.598$                     | $r=-0.194, P=0.353$                     | $r=-0.086, P=0.663$                     |

Note: Abbreviations: SZ, schizophrenia; MDD, major depressive disorder; BM, bipolar mania; BD, bipolar depression; PD, panic disorder; BMI, body mass index; SAPS, Scale for Assessment Positive Symptom; HARS, Hamilton Anxiety Rating Scale; HDRS, 17-item Hamilton Depression Rating Scale; YMRS, Young Mania Rating Scale; PDSS, Panic Disorder Severity Scale. tPA, tissue plasminogen activator; PAI-1, plasminogen activator inhibitor-1; BDNF, brain-derived neurotrophic factor; pro-BDNF, precursor-BDNF; TrkB, tropomyosin-related kinase B; p75NTR, neurotrophin receptor p75.
