# Supplementary material for: Combined serum levels of multiple proteins in tPA-BDNF pathway may aid the diagnosis of five mental disorders
Source: PubMed Central journal article supplement (PMC5537244; doi:10.1038/s41598-017-06832-6), 2017-07-31
Supplement: 41598_2017_6832_MOESM2_ESM.pdf [file 41598_2017_6832_MOESM2_ESM.pdf]

## **Combined serum levels of multiple proteins in tPA-BDNF pathway may aid the diagnosis of five mental disorders**

Suzhen Chen, MD<sup>1,2</sup>, Haitang Jiang, MD<sup>1,2</sup>, Yang Liu, BD<sup>3</sup>, Zhenhua Hou, MD<sup>1,2</sup>, Yingying Yue, MD<sup>1,2</sup>, Yuqun Zhang, MD<sup>1,2</sup>, Fuying Zhao, MD<sup>1,2</sup>, Zhi Xu, PhD<sup>1,2</sup>, Yinghui Li, MD<sup>1,2</sup>, Xiaodong Mou, PhD<sup>1,2</sup>, Lei Li, MD<sup>1,2</sup>, Tianyu Wang, MD<sup>1,2</sup>, Jingjing Zhao, BD<sup>4</sup>, Chongyang Han, MD<sup>4</sup>, Yuxiu Sui, PhD<sup>4</sup>, Ming Wang, BD<sup>5</sup>, Zhong Yang, BD<sup>5</sup>, Yan Lu, BD<sup>6</sup>, Yifeng Zhu, BD<sup>6</sup>, Jianhua Li, MD<sup>7</sup>, Xinhua Shen, MD<sup>7</sup>, Fei Sun, BD<sup>8</sup>, Qingsong Chen, BD<sup>8</sup>, Huanxin Chen, PhD<sup>9</sup> & Yonggui Yuan, PhD<sup>1,2\*</sup>

<sup>1</sup>Department of Psychosomatics and Psychiatry, ZhongDa Hospital, Medical School of Southeast University, Nanjing 210009, PR China.

<sup>2</sup>Institute of Psychosomatics, Medical School of Southeast University, Nanjing 210009, PR China.

<sup>3</sup>Institute of Neuropsychiatric, Brain Hospital, Nanjing Medical University, Nanjing 210029, PR China.

<sup>4</sup>Department of Psychiatry, Brain Hospital, Nanjing Medical University, Nanjing 210029, PR China.

<sup>5</sup>Department of Psychiatry, The Third People's Hospital of Changshu, Suzhou 215500, PR China.

<sup>6</sup>Department of Psychiatry, The Fourth People's Hospital of Zhangjiagang, Suzhou 215600, PR China.

<sup>7</sup>Department of Psychiatry, The Third People's Hospital of Huzhou, Huzhou 313000, PR China.

<sup>8</sup>Department of Psychiatry, The Second People's Hospital of Jingjiang, Taizhou 214500, PR China.

<sup>9</sup>Key Laboratory of Cognition and Personality, Ministry of Education; School of Psychology, Southwest University, Chongqing 400175, PR China.

\*Corresponding author at: Department of Psychosomatics and Psychiatry, ZhongDa Hospital, Medical School of Southeast University, Nanjing 210009, PR China.

Tel./fax:+86 25 83285124; E-mail address: yygylh2000@sina.com(Y. Yuan).

**Supplementary Table 2.** Results of ROC curve analysis among the six groups.

| Comparison | Analysis            | tPA (pg/ml) | PAI-1 (ng/ml) | BDNF (pg/ml) | proBDNF (pg/ml) | TrkB (pg/ml) | p75NTR (pg/ml) | ×6          |
|------------|---------------------|-------------|---------------|--------------|-----------------|--------------|----------------|-------------|
| SZ vs HCs  | Sensitivity         | 0.760       | 0.680         | 0.680        | 0.720           | 0.720        | 0.480          | 0.960       |
|            | Specificity         | 0.885       | 0.500         | 0.692        | 0.885           | 0.692        | 0.962          | 0.769       |
|            | AUC                 | 0.886       | 0.566         | 0.674        | 0.828           | 0.735        | 0.739          | 0.935       |
|            | Cutoff              | 2920.170    | 5.390         | 16137.240    | 468.250         | 504.000      | 582.005        | 0.257       |
|            | 95% CI <sup>a</sup> | 0.799-0.973 | 0.405-0.727   | 0.523-0.824  | 0.713-0.942     | 0.594-0.875  | 0.602-0.877    | 0.868-1.000 |
| SZ vs MDD  | Sensitivity         | 0.360       | 0.160         | 0.520        | 0.360           | 0.560        | 0.640          | 0.720       |
|            | Specificity         | 1.000       | 0.885         | 0.654        | 0.923           | 0.692        | 0.654          | 0.769       |
|            | AUC                 | 0.696       | 0.410         | 0.522        | 0.581           | 0.581        | 0.643          | 0.798       |
|            | Cutoff              | 3801.405    | 7.180         | 15730.260    | 575.930         | 501.545      | 134.250        | 0.481       |
|            | 95% CI <sup>a</sup> | 0.549-0.843 | 0.252-0.568   | 0.360-0.683  | 0.419-0.743     | 0.419-0.742  | 0.491-0.795    | 0.678-0.919 |
| SZ vs BM   | Sensitivity         | 0.727       | 0.955         | 0.591        | 0.273           | 0.682        | 1.000          | 0.955       |
|            | Specificity         | 0.615       | 0.346         | 0.692        | 0.846           | 0.654        | 0.154          | 0.462       |
|            | AUC                 | 0.650       | 0.662         | 0.578        | 0.475           | 0.656        | 0.541          | 0.745       |
|            | Cutoff              | 1872.525    | 4.820         | 15840.405    | 451.240         | 496.635      | 10.070         | 0.300       |
|            | 95% CI <sup>a</sup> | 0.494-0.807 | 0.508-0.815   | 0.412-0.744  | 0.306-0.643     | 0.497-0.814  | 0.376-0.706    | 0.608-0.882 |

|            |                     |             |             |             |             |             |             |             |
|------------|---------------------|-------------|-------------|-------------|-------------|-------------|-------------|-------------|
| SZ vs BD   | Sensitivity         | 0.526       | 0.158       | 0.526       | 0.053       | 0.947       | 0.579       | 0.842       |
|            | Specificity         | 0.692       | 0.885       | 0.731       | 1.000       | 0.192       | 0.654       | 0.654       |
|            | AUC                 | 0.574       | 0.426       | 0.637       | 0.334       | 0.467       | 0.618       | 0.721       |
|            | Cutoff              | 2166.495    | 7.310       | 17249.295   | 860.300     | 408.290     | 134.250     | 0.393       |
|            | 95% CI <sup>a</sup> | 0.400-0.747 | 0.253-0.600 | 0.472-0.802 | 0.170-0.498 | 0.294-0.639 | 0.455-0.782 | 0.570-0.871 |
| SZ vs PD   | Sensitivity         | 0.833       | 0.542       | 0.500       | 0.708       | 0.750       | 0.333       | 0.750       |
|            | Specificity         | 0.615       | 0.885       | 0.885       | 0.885       | 0.692       | 0.923       | 0.962       |
|            | AUC                 | 0.747       | 0.695       | 0.670       | 0.821       | 0.690       | 0.641       | 0.933       |
|            | Cutoff              | 1895.625    | 7.110       | 18633.720   | 458.530     | 513.815     | 421.530     | 0.689       |
|            | 95% CI <sup>a</sup> | 0.610-0.883 | 0.547-0.842 | 0.513-0.827 | 0.705-0.936 | 0.541-0.838 | 0.487-0.795 | 0.868-0.997 |
| MDD vs HCs | Sensitivity         | 0.760       | 0.480       | 0.920       | 0.800       | 0.520       | 0.480       | 0.680       |
|            | Specificity         | 0.560       | 0.800       | 0.400       | 0.600       | 0.760       | 0.840       | 0.880       |
|            | AUC                 | 0.666       | 0.635       | 0.642       | 0.699       | 0.664       | 0.623       | 0.763       |
|            | Cutoff              | 2862.285    | 6.185       | 13616.925   | 390.840     | 636.520     | 645.865     | 0.552       |
|            | 95% CI <sup>a</sup> | 0.515-0.818 | 0.478-0.792 | 0.486-0.798 | 0.552-0.846 | 0.514-0.814 | 0.464-0.782 | 0.624-0.903 |
| MDD vs BM  | Sensitivity         | 0.727       | 0.818       | 0.773       | 0.955       | 0.909       | 1.000       | 0.773       |
|            | Specificity         | 0.360       | 0.600       | 0.360       | 0.200       | 0.320       | 0.040       | 0.760       |

|           |                     |             |             |             |             |             |             |             |
|-----------|---------------------|-------------|-------------|-------------|-------------|-------------|-------------|-------------|
| MDD vs BD | AUC                 | 0.400       | 0.732       | 0.533       | 0.395       | 0.531       | 0.366       | 0.780       |
|           | Cutoff              | 1815.930    | 5.085       | 13144.110   | 291.560     | 447.555     | 5.865       | 0.544       |
|           | 95% CI <sup>a</sup> | 0.235-0.565 | 0.588-0.876 | 0.365-0.700 | 0.230-0.559 | 0.362-0.700 | 0.207-0.526 | 0.645-0.915 |
|           | Sensitivity         | 1.000       | 0.316       | 0.263       | 0.000       | 0.947       | 1.000       | 0.895       |
|           | Specificity         | 0.040       | 0.800       | 0.960       | 1.000       | 0.200       | 0.080       | 0.800       |
| MDD vs PD | AUC                 | 0.377       | 0.512       | 0.621       | 0.298       | 0.393       | 0.440       | 0.893       |
|           | Cutoff              | 593.175     | 6.165       | 21088.095   | 11173.170   | 405.835     | 17.870      | 0.419       |
|           | 95% CI <sup>a</sup> | 0.211-0.542 | 0.336-0.687 | 0.452-0.790 | 0.144-0.452 | 0.224-0.561 | 0.269-0.611 | 0.795-0.990 |
|           | Sensitivity         | 0.833       | 0.833       | 0.542       | 0.792       | 0.750       | 0.417       | 0.750       |
|           | Specificity         | 0.360       | 0.600       | 0.800       | 0.560       | 0.520       | 0.720       | 0.840       |
| BM vs HCs | AUC                 | 0.532       | 0.747       | 0.658       | 0.698       | 0.607       | 0.485       | 0.825       |
|           | Cutoff              | 1839.030    | 5.125       | 18035.535   | 407.860     | 521.180     | 264.780     | 0.566       |
|           | 95% CI <sup>a</sup> | 0.366-0.698 | 0.608-0.885 | 0.501-0.816 | 0.551-0.845 | 0.446-0.767 | 0.318-0.652 | 0.707-0.943 |
|           | Sensitivity         | 0.840       | 0.120       | 0.520       | 0.880       | 0.600       | 0.560       | 0.920       |
|           | Specificity         | 0.636       | 0.909       | 0.773       | 0.682       | 0.773       | 0.909       | 0.773       |
|           | AUC                 | 0.813       | 0.434       | 0.609       | 0.813       | 0.643       | 0.719       | 0.909       |
|           | Cutoff              | 2357.310    | 9.115       | 17687.880   | 410.290     | 607.075     | 264.780     | 0.372       |

|           |                     |             |             |             |             |             |             |             |
|-----------|---------------------|-------------|-------------|-------------|-------------|-------------|-------------|-------------|
|           | 95% CI <sup>a</sup> | 0.693-0.932 | 0.268-0.599 | 0.443-0.775 | 0.689-0.936 | 0.479-0.806 | 0.571-0.867 | 0.827-0.991 |
| BM vs BD  | Sensitivity         | 0.526       | 0.000       | 0.526       | 0.053       | 0.053       | 0.474       | 0.789       |
|           | Specificity         | 0.591       | 1.000       | 0.727       | 1.000       | 0.955       | 0.727       | 0.955       |
|           | AUC                 | 0.464       | 0.267       | 0.590       | 0.353       | 0.285       | 0.591       | 0.935       |
|           | Cutoff              | 2191.830    | 4777.510    | 17603.985   | 1003.700    | 869.660     | 180.000     | 0.721       |
|           | 95% CI <sup>a</sup> | 0.282-0.646 | 0.109-0.424 | 0.411-0.769 | 0.181-0.525 | 0.122-0.447 | 0.415-0.767 | 0.862-1.000 |
| BM vs PD  | Sensitivity         | 0.708       | 0.542       | 0.542       | 0.708       | 0.667       | 0.417       | 0.667       |
|           | Specificity         | 0.636       | 0.682       | 0.773       | 0.773       | 0.591       | 0.909       | 0.955       |
|           | AUC                 | 0.650       | 0.533       | 0.614       | 0.808       | 0.596       | 0.606       | 0.871       |
|           | Cutoff              | 2352.855    | 7.100       | 17416.560   | 458.530     | 540.815     | 264.780     | 0.669       |
|           | 95% CI <sup>a</sup> | 0.489-0.810 | 0.364-0.703 | 0.447-0.780 | 0.685-0.931 | 0.428-0.763 | 0.440-0.772 | 0.770-0.972 |
| BD vs HCs | Sensitivity         | 0.760       | 0.680       | 0.920       | 0.840       | 0.640       | 0.480       | 0.920       |
|           | Specificity         | 0.789       | 0.579       | 0.263       | 0.842       | 0.895       | 0.947       | 0.947       |
|           | AUC                 | 0.815       | 0.636       | 0.514       | 0.886       | 0.753       | 0.672       | 0.975       |
|           | Cutoff              | 2746.785    | 5.420       | 13665.750   | 398.140     | 575.170     | 588.830     | 0.520       |
|           | 95% CI <sup>a</sup> | 0.688-0.941 | 0.470-0.801 | 0.326-0.701 | 0.785-0.987 | 0.607-0.899 | 0.512-0.832 | 0.937-1.000 |
| BD vs PD  | Sensitivity         | 0.625       | 0.917       | 0.542       | 0.708       | 0.750       | 0.417       | 0.958       |

|           |                     |             |             |             |             |             |             |             |
|-----------|---------------------|-------------|-------------|-------------|-------------|-------------|-------------|-------------|
|           | Specificity         | 0.789       | 0.526       | 0.684       | 0.947       | 0.789       | 0.789       | 0.895       |
|           | AUC                 | 0.684       | 0.750       | 0.531       | 0.894       | 0.755       | 0.535       | 0.978       |
|           | Cutoff              | 2571.555    | 4.805       | 18037.950   | 461.330     | 521.180     | 264.780     | 0.482       |
|           | 95% CI <sup>a</sup> | 0.521-0.847 | 0.602-0.898 | 0.355-0.706 | 0.798-0.989 | 0.606-0.905 | 0.360-0.710 | 0.945-1.000 |
| PD vs HCs | Sensitivity         | 0.720       | 0.000       | 0.920       | 0.600       | 0.320       | 0.480       | 0.640       |
|           | Specificity         | 0.583       | 1.000       | 0.333       | 0.542       | 0.917       | 0.833       | 0.917       |
|           | AUC                 | 0.664       | 0.398       | 0.440       | 0.520       | 0.570       | 0.631       | 0.802       |
|           | Cutoff              | 2952.375    | 16.700      | 13649.475   | 507.510     | 940.830     | 658.200     | 0.592       |
|           | 95% CI <sup>a</sup> | 0.512-0.817 | 0.237-0.558 | 0.265-0.615 | 0.355-0.685 | 0.405-0.735 | 0.473-0.789 | 0.677-0.927 |

Notes: ×6: combination of tPA, PAI-1, BDNF, proBDNF, TrkB and p75NTR; <sup>a</sup>95% CI for AUC.

Abbreviations: AUC, area under the curve; SZ, schizophrenia; MDD, major depressive disorder; BM, bipolar mania; BD, bipolar depression; PD, panic disorder; HCs, healthy controls; BMI, body mass index; SAPS, Scale for Assessment Positive Symptom; HARS, Hamilton Anxiety Rating Scale; HDRS, 17-item Hamilton Depression Rating Scale; YMRS, Young Mania Rating Scale; PDSS, Panic Disorder Severity Scale; tPA, tissue plasminogen activator; PAI-1, plasminogen activator inhibitor-1; BDNF, brain-derived neurotrophic factor; pro-BDNF, precursor-BDNF; TrkB, tropomyosin-related kinase B; p75NTR, neurotrophin receptor p75.
